# Supplementary material
Source: publisher site journal article supplement (https://www.dovepress.com/article/599922)
Supplement: Supplementary file 1 [file 599922%20Supplementary%20Information%20file.docx]

**Appendix 1: PRISMA checklist**

| **Section and Topic** | **Item #** | **Checklist item** | **Location where item is reported** |
| --- | --- | --- | --- |
| **TITLE** | | |  |
| Title | 1 | Identify the report as a systematic review. | Title page |
| **ABSTRACT** | | |  |
| Abstract | 2 | See the PRISMA 2020 for Abstracts checklist. | See in abstract check list |
| **INTRODUCTION** | | |  |
| Rationale | 3 | Describe the rationale for the review in the context of existing knowledge. | Page 3  introduction |
| Objectives | 4 | Provide an explicit statement of the objective(s) or question(s) the review addresses. | Page 6  introduction |
| **METHODS** | | |  |
| Eligibility criteria | 5 | Specify the inclusion and exclusion criteria for the review and how studies were grouped for the syntheses. | Page 7  Eligibility criteria |
| Information sources | 6 | Specify all databases, registers, websites, organisations, reference lists and other sources searched or consulted to identify studies. Specify the date when each source was last searched or consulted. | Page 7  Literature Retrieval |
| Search strategy | 7 | Present the full search strategies for all databases, registers and websites, including any filters and limits used. | Page 9  Data Extraction and Appendix 2 |
| Selection process | 8 | Specify the methods used to decide whether a study met the inclusion criteria of the review, including how many reviewers screened each record and each report retrieved, whether they worked independently, and if applicable, details of automation tools used in the process. | Page 9  Data Extraction |
| Data collection process | 9 | Specify the methods used to collect data from reports, including how many reviewers collected data from each report, whether they worked independently, any processes for obtaining or confirming data from study investigators, and if applicable, details of automation tools used in the process. | Page 9  Data Extraction |
| Data items | 10a | List and define all outcomes for which data were sought. Specify whether all results that were compatible with each outcome domain in each study were sought (e.g. for all measures, time points, analyses), and if not, the methods used to decide which results to collect. | Page 7 Eligibility criteria and page 9  Data Extraction |
| 10b | List and define all other variables for which data were sought (e.g. participant and intervention characteristics, funding sources). Describe any assumptions made about any missing or unclear information. | Page 9  Data Extraction |
| Study risk of bias assessment | 11 | Specify the methods used to assess risk of bias in the included studies, including details of the tool(s) used, how many reviewers assessed each study and whether they worked independently, and if applicable, details of automation tools used in the process. | Page 10  Risk of bias |
| Effect measures | 12 | Specify for each outcome the effect measure(s) (e.g. risk ratio, mean difference) used in the synthesis or presentation of results. | Page 11  Data Synthesis and Analysis |
| Synthesis methods | 13a | Describe the processes used to decide which studies were eligible for each synthesis (e.g. tabulating the study intervention characteristics and comparing against the planned groups for each synthesis (item #5)). | Page 11  Data Synthesis and Analysis |
| 13b | Describe any methods required to prepare the data for presentation or synthesis, such as handling of missing summary statistics, or data conversions. | Page 11  Data Synthesis and Analysis |
| 13c | Describe any methods used to tabulate or visually display results of individual studies and syntheses. | Page 11  Data Synthesis and Analysis |
| 13d | Describe any methods used to synthesize results and provide a rationale for the choice(s). If meta-analysis was performed, describe the model(s), method(s) to identify the presence and extent of statistical heterogeneity, and software package(s) used. | Page 11  Data Synthesis and Analysis |
| 13e | Describe any methods used to explore possible causes of heterogeneity among study results (e.g. subgroup analysis, meta-regression). | Page 11  Data Synthesis and Analysis |
| 13f | Describe any sensitivity analyses conducted to assess robustness of the synthesized results. | Page 11  Data Synthesis and Analysis |
| Reporting bias assessment | 14 | Describe any methods used to assess risk of bias due to missing results in a synthesis (arising from reporting biases). | Page 11  Data Synthesis and Analysis |
| Certainty assessment | 15 | Describe any methods used to assess certainty (or confidence) in the body of evidence for an outcome. | Page 10  Assessment of Evidence Quality |
| **RESULTS** | | |  |
| Study selection | 16a | Describe the results of the search and selection process, from the number of records identified in the search to the number of studies included in the review, ideally using a flow diagram. | Page 12  Search results |
| 16b | Cite studies that might appear to meet the inclusion criteria, but which were excluded, and explain why they were excluded. | Figure 1  Flowchart figure |
| Study characteristics | 17 | Cite each included study and present its characteristics. | Page 12  Study Characteristics and Table 1 |
| Risk of bias in studies | 18 | Present assessments of risk of bias for each included study. | Page 13  Quality appraisal of literature and figures 2 and 3 |
| Results of individual studies | 19 | For all outcomes, present, for each study: (a) summary statistics for each group (where appropriate) and (b) an effect estimate and its precision (e.g. confidence/credible interval), ideally using structured tables or plots. | Appendix 3, Table 3 and 4 |
| Results of syntheses | 20a | For each synthesis, briefly summarise the characteristics and risk of bias among contributing studies. | Page 13-14  Figures 4 and 5, Appendix 4, Tables 3 and 4 |
| 20b | Present results of all statistical syntheses conducted. If meta-analysis was done, present for each the summary estimate and its precision (e.g. confidence/credible interval) and measures of statistical heterogeneity. If comparing groups, describe the direction of the effect. | Page 15  Pain intensity and fatigue |
| 20c | Present results of all investigations of possible causes of heterogeneity among study results. | Appendix 4, Table5 |
| 20d | Present results of all sensitivity analyses conducted to assess the robustness of the synthesized results. | Page 16 and Appendix 5 |
| Reporting biases | 21 | Present assessments of risk of bias due to missing results (arising from reporting biases) for each synthesis assessed. | Page 16  Publications bias  Figure 8 and 9 |
| Certainty of evidence | 22 | Present assessments of certainty (or confidence) in the body of evidence for each outcome assessed. | Page 13  Grade and Appendix 4, Table 1 and Table 2 |
| **DISCUSSION** | | |  |
| Discussion | 23a | Provide a general interpretation of the results in the context of other evidence. | Page 16-17  Mian findings |
| 23b | Discuss any limitations of the evidence included in the review. | Page 24-25  Strength and limitation |
| 23c | Discuss any limitations of the review processes used. | Page 24-25  Strength and limitation |
| 23d | Discuss implications of the results for practice, policy, and future research. | Page 26  Conclusion |
| **OTHER INFORMATION** | | |  |
| Registration and protocol | 24a | Provide registration information for the review, including register name and registration number, or state that the review was not registered. | Page 6  Protocol and registration |
| 24b | Indicate where the review protocol can be accessed, or state that a protocol was not prepared. | Page 6  Protocol and registration |
| 24c | Describe and explain any amendments to information provided at registration or in the protocol. | Page 6  Protocol and registration |
| Support | 25 | Describe sources of financial or non-financial support for the review, and the role of the funders or sponsors in the review. | Declaration |
| Competing interests | 26 | Declare any competing interests of review authors. | Declaration |
| Availability of data, code and other materials | 27 | Report which of the following are publicly available and where they can be found: template data collection forms; data extracted from included studies; data used for all analyses; analytic code; any other materials used in the review. | Appendix 1-5 |

*From:*  Page MJ, McKenzie JE, Bossuyt PM, Boutron I, Hoffmann TC, Mulrow CD, et al. The PRISMA 2020 statement: an updated guideline for reporting systematic reviews. BMJ 2021;372:n71. doi: 10.1136/bmj.n71. This work is licensed under CC BY 4.0. To view a copy of this license, visit <https://creativecommons.org/licenses/by/4.0/>

**Appendix 2. Search strategy**

Cochrane

#1 MeSH descriptor: [Tai Ji] explode all trees

#2 (Tai Ji OR Tai-ji OR Tai Chi OR Chi, Tai OR Tai Chi Chuan OR Taiji OR Taijiquan OR T'ai Chi OR Tai Ji Quan OR Ji Quan, Tai OR Quan, Tai Ji):ti,ab,kw (Word variations have been searched)

#3 MeSH descriptor: [Qigong] explode all trees

#4 (Tai Ji OR Tai-ji OR Tai Chi OR Chi, Tai OR Tai Chi Chuan OR Taiji OR Taijiquan OR T'ai Chi OR Tai Ji Quan OR Ji Quan, Tai OR Quan, Tai JiQigong OR Qi Gong OR Ch'i Kung):ti,ab,kw (Word variations have been searched)

#5 (Mind-Body Therapies OR Mind Body Therapies OR Mind-Body Therapy OR Therapies, Mind-Body OR Therapy, Mind-Body OR Mind-Body Medicine OR Mind Body Medicine):ti,ab,kw (Word variations have been searched)

#6 MeSH descriptor: [Mind-Body Therapies] explode all trees

#7 MeSH descriptor: [Yoga] explode all trees

#8 (Yoga OR pranayama OR yoga OR hot yoga OR hatha yoga OR iyengar yoga OR yoganidra):ti,ab,kw (Word variations have been searched)

#9 MeSH descriptor: [Exercise Movement Techniques] explode all trees

#10 (Exercise Movement Techniques OR Movement Techniques, Exercise OR Exercise Movement Technics OR Pilates-Based Exercises OR Exercises, Pilates-Based OR Pilates Based Exercises OR Pilates Training OR Training, Pilates):ti,ab,kw (Word variations have been searched)

#11 (baduanjin OR baduanjin exercise OR eight trigrams boxing OR Eight Pieces of Brocade OR Eight-Section Brocade OR Eight Silken Movements OR Eight Silk Weaving OR baduanjin qigong):ti,ab,kw (Word variations have been searched)

#12 MeSH descriptor: [Cancer Pain] explode all trees

#13 (Cancer Pain OR Cancer Pains OR Pain, Cancer OR Pains, Cancer OR Cancer Related Pain OR Cancer Related Pain OR Cancer-Related Pains OR Pain, Cancer Related OR Pains, Cancer-Related OR Cancer-Associated Pain OR Cancer Associated Pain OR Cancer-Associated Pains OR Pain, Cancer-Associated OR Pains, Cancer Associated OR Neoplasm-Related Pain OR Neoplasm Related Pain OR Neoplasm Related Pains OR Pain, Neoplasm-Related OR Pains, Neoplasm-Related OR Neoplasm Associated Pain OR Neoplasm Associated Pain OR Neoplasm-Associated Pains OR Pain, Neoplasm-Associated OR Pains, Neoplasm-Associated OR Oncological Pain OR Oncological Pains OR Pain, Oncological OR Pains, Oncological OR Tumor-Related Pain OR Pains, Tumor-Related OR Pain, Tumor-Related OR Tumor Related Pain OR Tumor Related Pains OR Tumor-Associated Pain OR Pains, Tumor-Associated OR Pain, Tumor Associated OR Tumor Associated Pain OR Tumor-Associated Pains OR Oncology Pain OR Oncology Pains OR Pain, Oncology OR Pains, Oncology):ti,ab,kw (Word variations have been searched)

#14 #1 OR #2 OR #3 OR #4 OR #5 OR #6 OR #7 OR #8 OR #9 OR #10 OR #11

#15 #12 OR #13

#16 #14 AND #15

Embase

#1. 'cancer pain'/exp

#2. 'cancer pain':ab,ti OR 'cancer pains':ab,ti OR 'pain, cancer':ab,ti OR 'pains, cancer':ab,ti OR 'cancer-related pain':ab,ti OR 'cancer related pain':ab,ti OR 'cancer related pains':ab,ti OR 'pain, cancer-related':ab,ti OR 'pains, cancer-related':ab,ti OR 'cancer-associated pain':ab,ti OR 'cancer associated pain':ab,ti OR 'cancer-associated pains':ab,ti OR 'pain, cancer-associated':ab,ti OR 'pains, cancer-associated':ab,ti OR 'neoplasm-related pain':ab,ti OR 'neoplasm related pain':ab,ti OR 'neoplasm-related pains':ab,ti OR 'pain, neoplasm-related':ab,ti OR 'pains, neoplasm-related':ab,ti OR 'neoplasm-associated pain':ab,ti OR 'neoplasm associated pain':ab,ti OR 'neoplasm associated pains':ab,ti OR 'pain, neoplasm-associated':ab,ti OR 'pains, neoplasm associated':ab,ti OR 'oncological pain':ab,ti OR 'oncological pains':ab,ti OR 'pain, oncological':ab,ti OR 'pains, oncological':ab,ti OR 'tumor-related pain':ab,ti OR 'pains, tumor-related':ab,ti OR 'pain, tumor-related':ab,ti OR 'tumor related pain':ab,ti OR 'tumor-related pains':ab,ti OR 'tumor-associated pain':ab,ti OR 'pains, tumor associated':ab,ti OR 'pain, tumor-associated':ab,ti OR 'tumor associated pain':ab,ti OR 'tumor-associated pains':ab,ti OR 'oncology pain':ab,ti OR 'oncology pains':ab,ti OR 'pain, oncology':ab,ti OR 'pains, oncology':ab,ti

#3. #1 OR #2

#4. 'tai chi'/exp

#5. 'tai ji':ab,ti OR 'tai-ji':ab,ti OR 'tai chi':ab,ti OR 'chi, tai':ab,ti OR 'tai chi chuan':ab,ti OR 'taiji':ab,ti OR 'taijiquan':ab,ti OR 'tai ji quan':ab,ti OR 'ji quan, tai':ab,ti OR 'quan, tai ji':ab,ti

#6. #3 OR #4

#7. 'qigong'/exp

#8. 'qigong':ab,ti OR 'qi gong':ab,ti OR 'chi kung':ab,ti

#9. #7 OR #8

#10. 'hatha yoga'/exp

#11. 'yoga':ab,ti OR 'pranayama':ab,ti OR 'hatha yoga':ab,ti OR 'hot yoga':ab,ti OR 'yoganidra':ab,ti

#12. #10 OR #11

#13. 'pilates'/exp

#14. 'exercise movement technics':ti,ab OR 'pilates-based exercises':ti,ab OR 'exercises, pilates-based':ti,ab OR 'pilates based exercises':ti,ab OR 'pilates training':ti,ab OR 'training, pilates':ti,ab

#15. #13 OR #14

#16. 'alternative medicine'/exp

#17. 'alternative medicine':ab,ti OR 'mind-body therapies':ab,ti OR 'mind body therapies':ab,ti OR 'mind-body therapy':ab,ti OR 'therapies, mind-body':ab,ti OR 'therapy, mind-body':ab,ti OR 'mind-body medicine':ab,ti OR 'mind body medicine':ab,ti

#18. #16 OR #17

#19. 'baduanjin':ab,ti OR 'baduanjin exercise':ab,ti OR 'eight trigrams boxing':ab,ti OR 'eight pieces brocade':ab,ti OR 'eight-section brocade':ab,ti OR 'eight silken movements':ab,ti OR 'eight silk weaving':ab,ti OR 'baduanjin qigong':ab,t

#20. #6 OR #9 OR #12 OR #15 OR #18 OR #19

#21. #3 AND #20

Pubmed

#1 (((((((((((((((((((((((((((((((((((((((((Cancer Pain[MeSH Terms]) OR (Cancer Pains[Title/Abstract])) OR (Pain, Cancer[Title/Abstract])) OR (Pains, Cancer[Title/Abstract])) OR (Cancer-Related Pain[Title/Abstract])) OR (Cancer Related Pain[Title/Abstract])) OR (Cancer-Related Pains[Title/Abstract])) OR (Pain, Cancer Related[Title/Abstract])) OR (Pains, Cancer-Related[Title/Abstract])) OR (Cancer Associated Pain[Title/Abstract])) OR (Cancer Associated Pain[Title/Abstract])) OR (Cancer-Associated Pains[Title/Abstract])) OR (Pain, Cancer-Associated[Title/Abstract])) OR (Pains, Cancer-Associated[Title/Abstract])) OR (Neoplasm-Related Pain[Title/Abstract])) OR (Neoplasm Related Pain[Title/Abstract])) OR (Neoplasm Related Pains[Title/Abstract])) OR (Pain, Neoplasm-Related[Title/Abstract])) OR (Pains, Neoplasm-Related[Title/Abstract])) OR (Neoplasm-Associated Pain[Title/Abstract])) OR (Neoplasm Associated Pain[Title/Abstract])) OR (Neoplasm-Associated Pains[Title/Abstract])) OR (Pain, Neoplasm-Associated[Title/Abstract])) OR (Pains, Neoplasm-Associated[Title/Abstract])) OR (Oncological Pain[Title/Abstract])) OR (Oncological Pains[Title/Abstract])) OR (Pain, Oncological[Title/Abstract])) OR (Pains, Oncological[Title/Abstract])) OR (Tumor-Related Pain[Title/Abstract])) OR (Pains, Tumor-Related[Title/Abstract])) OR (Pain, Tumor-Related[Title/Abstract])) OR (Tumor Related Pain[Title/Abstract])) OR (Tumor-Related Pains[Title/Abstract])) OR (Tumor Associated Pain[Title/Abstract])) OR (Pains, Tumor-Associated[Title/Abstract])) OR (Pain, Tumor-Associated[Title/Abstract])) OR (Tumor Associated Pain[Title/Abstract])) OR (Tumor-Associated Pains[Title/Abstract])) OR (Oncology Pain[Title/Abstract])) OR (Oncology Pains[Title/Abstract])) OR (Pain, Oncology[Title/Abstract])) OR (Pains, Oncology[Title/Abstract])

#2 ((((((((((Tai Ji[MeSH Terms]) OR (Tai-ji[Title/Abstract])) OR (Tai Chi[Title/Abstract])) OR (Chi, Tai[Title/Abstract])) OR (Tai Chi Chuan[Title/Abstract])) OR (Taiji[Title/Abstract])) OR (Taijiquan[Title/Abstract])) OR (T'ai Chi[Title/Abstract])) OR (Tai Ji Quan[Title/Abstract])) OR (Ji Quan, Tai[Title/Abstract])) OR (Quan, Tai Ji[Title/Abstract])

#3 (((Qigong[MeSH Terms]) ) OR (Qi Gong[Title/Abstract])) OR (Ch'i Kung[Title/Abstract])

#4 ((((((Mind-Body Therapies[MeSH Terms]) OR (Mind Body Therapies[Title/Abstract])) OR (Mind-Body Therapy[Title/Abstract])) OR (Therapies, Mind-Body[Title/Abstract])) OR (Therapy, Mind-Body[Title/Abstract])) OR (Mind-Body Medicine[Title/Abstract])) OR (Mind Body Medicine[Title/Abstract])

#5 ((((((Yoga[MeSH Terms]) OR (pranayama[Title/Abstract])) OR (yoga[Title/Abstract])) OR (hot yoga[Title/Abstract])) OR (hatha yoga[Title/Abstract])) OR (iyengar yoga[Title/Abstract])) OR (yoganidra[Title/Abstract])

#6 (((((((Exercise Movement Techniques[Title/Abstract]) OR (Movement Techniques, Exercise[Title/Abstract])) OR (Exercise Movement Technics[Title/Abstract])) OR (Pilates Based Exercises[Title/Abstract])) OR (Exercises, Pilates-Based[Title/Abstract])) OR (Pilates Based Exercises[Title/Abstract])) OR (Pilates Training[Title/Abstract])) OR (Training, Pilates[Title/Abstract])

#7 (((((((baduanjin[Title/Abstract]) OR (baduanjin exercise[Title/Abstract])) OR (eight trigrams boxing[Title/Abstract])) OR (Eight Pieces Brocade[Title/Abstract])) OR (Eight Section Brocade[Title/Abstract])) OR (Eight Silken Movements[Title/Abstract])) OR (Eight Silk Weaving[Title/Abstract])) OR (baduanjin qigong[Title/Abstract])

#8 (((((((((((((((Tai Ji[MeSH Terms]) OR (Tai-ji[Title/Abstract])) OR (Tai Chi[Title/Abstract])) OR (Chi, Tai[Title/Abstract])) OR (Tai Chi Chuan[Title/Abstract])) OR (Taiji[Title/Abstract])) OR (Taijiquan[Title/Abstract])) OR (T'ai Chi[Title/Abstract])) OR (Tai Ji Quan[Title/Abstract])) OR (Ji Quan, Tai[Title/Abstract])) OR (Quan, Tai Ji[Title/Abstract])) OR ((((Qigong[MeSH Terms]) ) OR (Qi Gong[Title/Abstract])) OR (Ch'i Kung[Title/Abstract]))) OR (((((((Mind-Body Therapies[MeSH Terms]) OR (Mind Body Therapies[Title/Abstract])) OR (Mind-Body Therapy[Title/Abstract])) OR (Therapies, Mind-Body[Title/Abstract])) OR (Therapy, Mind-Body[Title/Abstract])) OR (Mind-Body Medicine[Title/Abstract])) OR (Mind Body Medicine[Title/Abstract]))) OR (((((((Yoga[MeSH Terms]) OR (pranayama[Title/Abstract])) OR (yoga[Title/Abstract])) OR (hot yoga[Title/Abstract])) OR (hatha yoga[Title/Abstract])) OR (iyengar yoga[Title/Abstract])) OR (yoganidra[Title/Abstract]))) OR ((((((((Exercise Movement Techniques[Title/Abstract]) OR (Movement Techniques, Exercise[Title/Abstract])) OR (Exercise Movement Technics[Title/Abstract])) OR (Pilates-Based Exercises[Title/Abstract])) OR (Exercises, Pilates-Based[Title/Abstract])) OR (Pilates Based Exercises[Title/Abstract])) OR (Pilates Training[Title/Abstract])) OR (Training, Pilates[Title/Abstract]))) OR ((((((((baduanjin[Title/Abstract]) OR (baduanjin exercise[Title/Abstract])) OR (eight trigrams boxing[Title/Abstract])) OR (Eight Pieces Brocade[Title/Abstract])) OR (Eight-Section Brocade[Title/Abstract])) OR (Eight Silken Movements[Title/Abstract])) OR (Eight Silk Weaving[Title/Abstract])) OR (baduanjin qigong[Title/Abstract])) #9 #2 OR #3 OR #4 OR #5 OR #6 OR #7 OR #8 OR #9

#10 #1 AND #9

WOS

((((((TS=(Tai Ji OR Tai-ji OR Tai Chi OR Tai Chi Chuan OR Taiji OR Taijiquan OR T'ai Chi OR Tai Ji Quan)) OR TS=(Qigong OR Qi Gong OR Ch'i Kung)) OR TS=(Mind-Body Therapies OR Mind Body Therapies OR Mind-Body Therapy OR Mind-Body Medicine OR Mind Body Medicine)) OR TS=(Yoga OR pranayama OR yoga OR hot yoga OR hatha yoga OR iyengar yoga OR yoganidra)) OR TS=(Exercise Movement Techniques OR Exercise Movement Technics OR Pilates-Based Exercises OR Pilates Based Exercises OR Pilates Training)) OR TS=(baduanjin OR baduanjin exercise OR eight trigrams boxing OR Eight Pieces of Brocade OR Eight-Section Brocade OR Eight Silken Movements OR Eight Silk Weaving OR baduanjin qigong)) AND TS=(Cancer Pain OR Cancer Pains OR Pain, Cancer OR Cancer-Related Pain OR Cancer Related Pain OR Cancer-Related Pains OR Cancer-Associated Pain OR Cancer Associated Pain OR Cancer-Associated Pains OR Neoplasm-Related Pain OR Neoplasm Related Pain OR Neoplasm-Related Pains OR Neoplasm-Associated Pain OR Neoplasm Associated Pain OR Neoplasm-Associated Pains OR Oncological Pain OR Oncological Pains OR Tumor Related Pain OR Pains, Tumor-Related OR Tumor Related Pain OR Tumor-Related Pains OR Tumor-Associated Pain OR Tumor Associated Pain OR Tumor-Associated Pains OR Oncology Pain OR Oncology Pains )

SinoMed

#1 "Mind-body therapy" [unweighted: exploded]

#2 "Tai Chi" [unweighted: exploded]

#3 "Tai Chi Chuan" [unweighted: exploded]

#4 "Qigong" [unweighted: exploded]

#5 "Wuqinxi" [unweighted: exploded]

#6 "Traditional Chinese health preservation" [unweighted: exploded]

#7 "Yoga" [unweighted: exploded]

#8 "Pilates"

#9 "Physical exercise" [unweighted: exploded]

#10 "Autogenic training" [unweighted: exploded]

#11 "Cancer pain" [unweighted: exploded]

#12 #1 OR #2 OR #3 OR #4 OR #5 OR #6 OR #7 OR #8 OR #9 OR #10

#13 #12 AND #11

CNKI

#1 Cancer pain

#2 Cancer pain OR tumor pain OR cancer-related pain OR cancer-associated pain

#3 Physical exercise

#4 Physical exercise OR mind-body therapy OR mind-body exercise OR Tai Chi OR Tai Chi Chuan OR Baduanjin OR Wuqinxi OR Liuzijue OR Yoga OR Pilates OR Traditional Chinese health preservation OR Autogenic training OR Qigong

#5 #1 OR #2

#6 #3 OR #4

#7 #5 AND #6

Wanfang

(Subject: cancer pain OR Title/Keyword: cancer pain OR tumor pain OR cancer-related pain OR cancer-associated pain)

AND

(Subject: physical exercise OR Title/Keyword: physical exercise OR mind-body therapy OR mind-body exercise OR Tai Chi OR Tai Chi Chuan OR Baduanjin OR Wuqinxi OR Liuzijue OR Yoga OR Pilates OR Traditional Chinese health preservation OR Autogenic training OR Qigong)

VIP

#1 Cancer pain OR tumor pain OR cancer-related pain OR cancer-associated pain

#2 Physical exercise OR mind-body therapy OR mind-body exercise OR Tai Chi OR Tai Chi Chuan OR Baduanjin OR Wuqinxi OR Liuzijue OR Yoga OR Pilates OR Traditional Chinese health preservation OR Autogenic training OR Qigong

#3 #1 AND #2

**Appendix 3. Pain etiology adjudication and effect modifiers**

**Table S1.Pain-etiology adjudication for included RCTs**

This table is drafted from the study characteristics and reference titles in your manuscript. It is meant to document how each included trial was judged regarding neuropathic vs non-neuropathic predominance.

| **Study** | **Cancer stage/ type/ timing** | **Volume** | **supervision** | **Treatment context signal (from title/description)** | **Pain-type judgement** | **Rationale (short)** |
| --- | --- | --- | --- | --- | --- | --- |
| A. Zengin Alpozgen et.al 201745 | Stage I- III  Breast cancer  - | Frequency: 3 days/ week  Duration: 8 weeks  Session: - | Physiotherapist/  Physiotherapist/  No supervision | Upper-extremity disorders related to breast cancer treatment | Probable non-neuropathic predominant | Focus on musculoskeletal/UE dysfunction; no neuropathic keywords reported. |
| Barbosa, K. P. et.al 202146 | Stage I- III  Breast cancer  During hormone therapy | Frequency: 2 days/ week  Duration: 8 weeks  Session: 75 min | Exercise science professional/ Exercise science professional / No supervision | Arthralgia during hormone therapy | Probable non-neuropathic predominant | Arthralgia is typically nociceptive/inflammatory; no neuropathic descriptors. |
| Boing, L. et.al 202347 | Stage I- III  Breast cancer  During hormone therapy | Frequency: 3 days/w eek  Duration: 16 weeks  Session: 60 min | Physiotherapist/ Physiotherapist/  No supervision | Receiving hormone therapy | Probable non-neuropathic predominant | Pain not framed as neuropathy; population defined by hormone-therapy survivorship. |
| Huberty, J. et.al 201948 | -  Myeloproliferative neoplasm patients  Ongoing disease management | Frequency: 1 days/ week  Duration: 16 weeks  Session: 60min | Online and self-report/ No supervision | Symptom burden in MPN; not neuropathy-specific | Probable non-neuropathic predominant | No explicit neuropathy/CIPN focus; pain assessed as general symptom burden. |
| Liu. W et.al 202249 | Stage I or II  Breast cancer  Postoperative | Frequency: -  Duration: 8 weeks  Session: - | Physiotherapist/ No supervision | Received adjuvant chemotherapy | Unclear (possible treatment-related neuropathic pain) | Chemotherapy context increases CIPN risk; trial description does not clearly rule neuropathic features in/out. |
| Lotzke, D. et.al 201650 | Stage I–III  breast cancer  During endocrine therapy | Frequency: 1 time/ week  Duration: 16 weeks  Session: - | Exercise science professional/ Physiotherapist | During (neo)adjuvant therapy | Probable non-neuropathic predominant (but treatment context noted) | No neuropathy/CIPN emphasis |
| Loudon, A. et.al 201451 | Stage I–III  Breast cancer  After routine therapy | Frequency: everyday  Duration: 8 weeks  Session: - | Exercise science professional/ No supervision | Breast cancer-related lymphoedema | Probable non-neuropathic predominant | Lymphoedema-related pain/swelling; neuropathic phenotype not described. |
| Mi Jiang et.al 202052 | -  Lung cancer  Postoperative | Frequency: 1h / day  Duration: 2 months  Session: 1h | Exercise science professional/ Exercise science professional | General lung cancer population | Probable non-neuropathic predominant | Not neuropathy-focused; pain measured as intensity without neuropathic descriptors. |
| Namazinia, M et.al 202353 | -  Cancer patients (mixed)  Undergoing chemotherapy | Frequency: 1 time/ week  Duration: 4 weeks  Session: - | Exercise science professional/ No supervision | Undergoing chemotherapy | Unclear (possible CIPN or other neuropathic treatment pain) | Chemotherapy context; pain etiology not specified—reasonable to treat as ‘unclear’ and test via sensitivity analysis. |
| Sibel Eyigor et.al 201854 | -  Breast cancer  Post-operative | Frequency: 2 days/ week  Duration: 10 weeks  Session: 1h | Exercise science professional/ No supervision | Shoulder and arm pain | Probable non-neuropathic predominant | Shoulder/arm pain commonly musculoskeletal; neuropathic syndrome not specified. |
| Torres, D. M. et.al 202355 | Stage 0- IIIC  Breast cancer  Post-operative | Frequency:2 days/week  Duration:6 weeks  Session:60 min | Physiotherapist/ Self-report | Submitted to adjuvant radiotherapy | Probable non-neuropathic predominant | Radiotherapy setting; pain not described as neuropathic/CIPN. |
| Vadiraja, H. S. et.al 200956 | Stang I- III  Breast cancer  Post-operative | Frequency: -  Duration: 6 weeks  Session: 60 min | Therapist and self-report/ No supervision | Symptom management (treatment not specified in title) | Probable non-neuropathic predominant | General symptom management trial; no neuropathic phenotype described. |
| Wang Y.B et.al 202257 | -  Breast cancer  Post-operative | Frequency:3 days/ week  Duration: 16 weeks  Session: 60 min | Wearable device and telephone/ No supervision | Post-operative breast cancer | Probable non-neuropathic predominant | Post-op context; trial focuses on functional recovery rather than neuropathic syndrome. |
| Wang Y. l et.al 201058 | -  Breast cancer  Post-operative | Frequency:  2 times/ day  Duration: 3 months  Session: - | Not report/ Self -report | Post-operative breast cancer | Probable non-neuropathic predominant | Post-op rehabilitation focus; no neuropathic descriptors reported. |

**Appendix 4. GRADE assessment and pairwise results**

1. Grade evidence assessment for Pain intensity

Table S2. Grade evidence assessment for Pain intensity

| Group | Amount of Study | Type of study | Risk of bias | Inconsistency | Imprecision | Indirectness | Other Bias | Grade |
| --- | --- | --- | --- | --- | --- | --- | --- | --- |
| Qigong vs. PC | 1 | randomized trials | serious a | no serious | Serious d | no serious | no serious | low |
| Pilates vs. Yoga | 1 | randomized trials | very serious ab | no serious | very serious cd | no serious | no serious | very low |
| Yoga vs. SE | 2 | randomized trials | very serious ab | no serious | very serious cd | no serious | no serious | very low |
| Yoga vs. PC | 1 | randomized trials | Serious a | no serious | very serious cd | no serious | no serious | very low |
| Taichi vs. SE | 2 | randomized trials | Serious a | very serious e | very serious cd | no serious | no serious | very low |
| Yoga vs. UC | 5 | randomized trials | Serious a | very serious e | Serious c | no serious | no serious | very low |
| Dance vs. UC | 1 | randomized trials | Serious a | no serious | very serious cd | no serious | no serious | very low |
| Pilates vs. SE | 3 | randomized trials | very serious ab | Serious f | very serious cd | no serious | no serious | very low |
| Pilates vs. UC | 2 | randomized trials | Serious a | no serious | very serious cd | no serious | no serious | very low |
| Pilates vs. PC | 1 | randomized trials | Serious a | no serious | very serious cd | no serious | no serious | very low |
| Pilates vs. Dance | 1 | randomized trials | Serious a | no serious | very serious cd | no serious | no serious | very low |
| a. No blinding  b. Most information derived from studies with some concerns c. 95% confidence interval (CI) crossed d. sample size too small e. I²≥75 % f. 50% ＜ I² ＜75% | | | | | | | | | |

1. Grade evidence assessment for Fatigue

Table S3. Grade evidence assessment for Fatigue

| Group | Amount of Study | Type of study | Risk of bias | Inconsistency | Imprecision | Indirectness | Other Bias | Grade |
| --- | --- | --- | --- | --- | --- | --- | --- | --- |
| Qigong vs. PC | 1 | randomized trials | very serious ab | no serious | Serious d | no serious | no serious | low |
| Yoga vs. SE | 1 | randomized trials | Serious a | no serious | very serious d | no serious | no serious | very low |
| Yoga vs. UC | 4 | randomized trials | Serious a | Serious e | very serious cd | no serious | no serious | very low |
| Yoga vs. PC | 1 | randomized trials | Serious a | no serious | very serious cd | no serious | no serious | very low |
| Pilates vs. UC | 1 | randomized trials | Serious a | no serious | very serious cd | no serious | no serious | very low |
| Dance vs. UC | 1 | randomized trials | Serious a | no serious | very serious cd | no serious | no serious | very low |
| Pilates vs.SE | 1 | randomized trials | Serious a | no serious | very serious cd | no serious | no serious | very low |
| a. Lack of blinding b. Most information derived from studies with some concerns  c. 95% confidence interval (CI) crossed d. Insufficient sample size e. 50% ＜ I² ＜75% | | | | | | | | |

1. Pairwise meta-analysis on Pain intensity

Table S4. Pairwise meta-analysis on Pain intensity

| Pain intensity | | | | | |
| --- | --- | --- | --- | --- | --- |
| Group | SMD | CI-lower | CI-upper | I2 | P |
| Qigong vs. PC | -2.482 | -3.708 | -1.255 | - | ＜0.001 |
| Yoga vs. PC | -0.247 | -0.819 | 0.326 | - | ＞0.05 |
| Pilates vs. Yoga | -0.066 | -0.492 | 0.36 | - | ＞0.05 |
| Yoga vs. SE | 0.002 | -0.407 | 0.410 | - | ＞0.05 |
| Taichi vs. SE | -1.219 | -2.94 | 0.502 | ≥50% | ＞0.05 |
| Yoga vs. UC | -0.433 | -1.304 | 0.437 | ≥50% | ＞0.05 |
| Dance vs. UC | 0 | -0.673 | 0.673 | - | ＞0.05 |
| Pilates vs. SE | -0.318 | -0.817 | 0.18 | ≥50% | ＞0.05 |
| Pilates vs. UC | -0.116 | -0.582 | 0.35 | ＜50% | ＞0.05 |
| Pilates vs. PC | -0.324 | -0.948 | 0.3 | - | ＞0.05 |
| Pilates vs. Dance | -0.084 | -0.738 | 0.57 | - | ＞0.05 |
| PC (Passive Control), SE (Standard Exercise), UC (Usual Care). | | | | | |

1. Pairwise meta-analysis on Fatigue

Table S5. Pairwise meta-analysis on Fatigue

| Fatigue | | | | | |
| --- | --- | --- | --- | --- | --- |
| Group | SMD | CI-Lower | CI-Upper | I2 | P |
| Qigong vs. PC | -1.043 | -1.991 | -0.095 | - | 0.031 |
| Yoga vs. SE | -0.014 | -0.423 | 0.394 | - | 0.945 |
| Yoga vs. UC | -0.236 | -0.593 | 0.12 | ≥50% | 0.194 |
| Yoga vs. PC | 0.039 | -0.531 | 0.609 | - | 0.894 |
| Pilates vs. UC | -0.286 | -0.964 | 0.391 | - | 0.407 |
| Dance vs. UC | -0.269 | -0.946 | 0.408 | - | 0.436 |
| Pilates vs.SE | -0.076 | -0.39 | 0.238 | - | 0.636 |
| PC (Passive Control), SE (Standard Exercise), UC (Usual Care). | | | | | |

1. Estimated between-studies standard deviation

Table S6. Estimated between-studies standard deviation (tau)

| Outcome | Estimated between-studies standard deviation |
| --- | --- |
| Pain intensity | 0.45345901 |
| Fatigue | 0.21188689 |

**Appendix 5. Sensitivity analyses**

1. Sensibility Analysis-Pain intensity (Fixed model)

Table S7: League table on pain intensity

| _Qigong_ | _Taichi_ | _Pilates_ | _Dance_ | _Yoga_ | _UC_ | _PC_ | _SE_ |
| --- | --- | --- | --- | --- | --- | --- | --- |
| Qigong | 1.56 (0.21,2.91) | 2.15 (0.82,3.48) | 2.31 (0.88,3.74) | 2.37 (1.06,3.69) | 2.39 (1.07,3.71) | 2.47 (1.23,3.71) | 2.54 (1.22,3.85) |
| **-1.56**  **(-2.91, -0.21)** | Taichi | 0.59 (0.10,1.08) | 0.75 (0.03,1.47) | 0.81 (0.38,1.25) | 0.83 (0.37,1.29) | 0.91 (0.38,1.45) | 0.97 (0.68,1.27) |
| **-2.15**  **(-3.48, -0.82)** | **-0.59**  **(-1.08, -0.10)** | Pilates | 0.16 (-0.44,0.76) | 0.22  (-0.18,0.63) | 0.24  (-0.15,0.62) | 0.32  (-0.15,0.80) | 0.39  (-0.01,0.78) |
| **-2.31**  **(-3.74, -0.88)** | **-0.75**  **(-1.47, -0.03)** | -0.16  (-0.76,0.44) | Dance | 0.06  (-0.57,0.70) | 0.08  (-0.53,0.68) | 0.16  (-0.55,0.88) | 0.23  (-0.43,0.88) |
| **-2.37**  **(-3.69, -1.06)** | **-0.81**  **(-1.25, -0.38)** | -0.22  (-0.63,0.18) | -0.06  (-0.70,0.57) | Yoga | 0.01  (-0.23,0.26) | 0.10  (-0.32,0.52) | 0.16  (-0.16,0.48) |
| **-2.39**  **(-3.71, -1.07)** | **-0.83**  **(-1.29, -0.37)** | -0.24  (-0.62,0.15) | -0.08  (-0.68,0.53) | -0.01  (-0.26,0.23) | UC | 0.08  (-0.37,0.54) | 0.15  (-0.21,0.50) |
| **-2.47**  **(-3.71, -1.23)** | **-0.91**  **(-1.45, -0.38)** | -0.32  (-0.80,0.15) | -0.16  (-0.88,0.55) | -0.10  (-0.52,0.32) | -0.08  (-0.54,0.37) | PC | 0.06  (-0.38,0.51) |
| **-2.54**  **(-3.85, -1.22)** | **-0.97**  **(-1.27, -0.68)** | -0.39  (-0.78,0.01) | -0.23  (-0.88,0.43) | -0.16 (  -0.48,0.16) | -0.15  (-0.50,0.21) | -0.06  (-0.51,0.38) | SE |
| The bold font indicates a statistical difference. PC (Passive Control), SE (Standard Exercise), UC (Usual Care). | | | | | | | |

Figure S1: The rank probability of pain intensity various interventions based on the SUCRA. The SUCRA metric was used to rank the effectiveness of each treatment and identify the best treatment. PC (passive control), SE (Standard Exercise), UC (Usual Care).


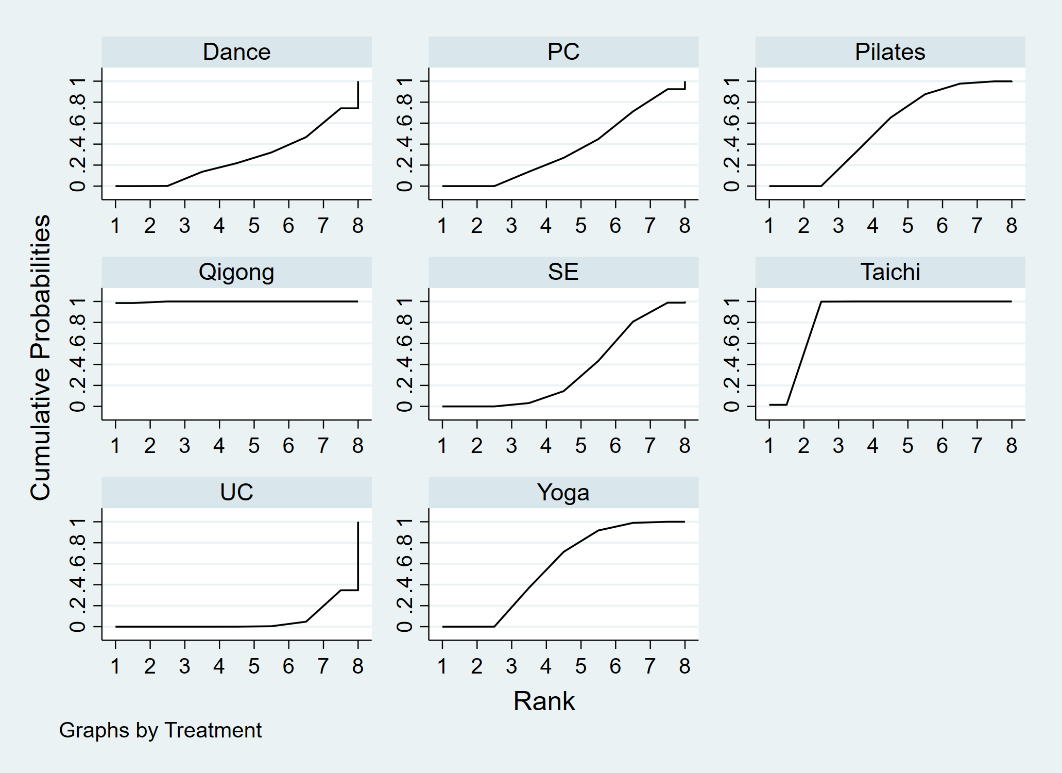


1. Sensibility Analysis-Fatigue (Fixed model)

Table S8: League table on Fatigue.

| _Qigong_ | _Dance_ | _Pilates_ | _Yoga_ | _PC_ | _SE_ | _UC_ |
| --- | --- | --- | --- | --- | --- | --- |
| Qigong | 0.98  (-0.29,2.26) | 1.01  (-0.17,2.20) | 1.07  (-0.03,2.18) | 1.04  (0.09,1.99) | 1.09  (-0.08,2.26) | 1.26  (0.13,2.39) |
| -0.98  (-2.26,0.29) | Dance | 0.03  (-0.58,0.64) | 0.09  (-0.54,0.72) | 0.06  (-0.79,0.90) | 0.11  (-0.53,0.74) | 0.28  (-0.34,0.90) |
| -1.01  (-2.20,0.17) | -0.03  (-0.64,0.58) | Pilates | 0.06  (-0.36,0.48) | 0.02  (-0.68,0.73) | 0.08  (-0.22,0.37) | 0.25  (-0.18,0.68) |
| -1.07  (-2.18,0.03) | -0.09  (-0.72,0.54) | -0.06  (-0.48,0.36) | Yoga | -0.04  (-0.61,0.53) | 0.02  (-0.35,0.38) | 0.19 (-0.03,0.40) |
| -1.04  (-1.99, -0.09) | -0.06  (-0.90,0.79) | -0.02  (-0.73,0.68) | 0.04  (-0.53,0.61) | PC | 0.05  (-0.62,0.73) | 0.22  (-0.38,0.83) |
| -1.09  (-2.26,0.08) | -0.11  (-0.74,0.53) | -0.08  (-0.37,0.22) | -0.02  (-0.38,0.35) | -0.05  (-0.73,0.62) | SE | 0.17  (-0.22,0.57) |
| **-1.26**  **(-2.39, -0.13)** | -0.28  (-0.90,0.34) | -0.25  (-0.68,0.18) | -0.19  (-0.40,0.03) | -0.22  (-0.83,0.38) | -0.17  (-0.57,0.22) | UC |
| The bold font indicates a statistical difference. PC (Passive Control), SE (Standard Exercise), UC (Usual Care). | | | | | | |

Figure S2 The rank probability of pain intensity various interventions based on the SUCRA. The SUCRA metric was used to rank the effectiveness of each treatment and identify the best treatment. PC (passive control), SE (Standard Exercise), UC (Usual Care).


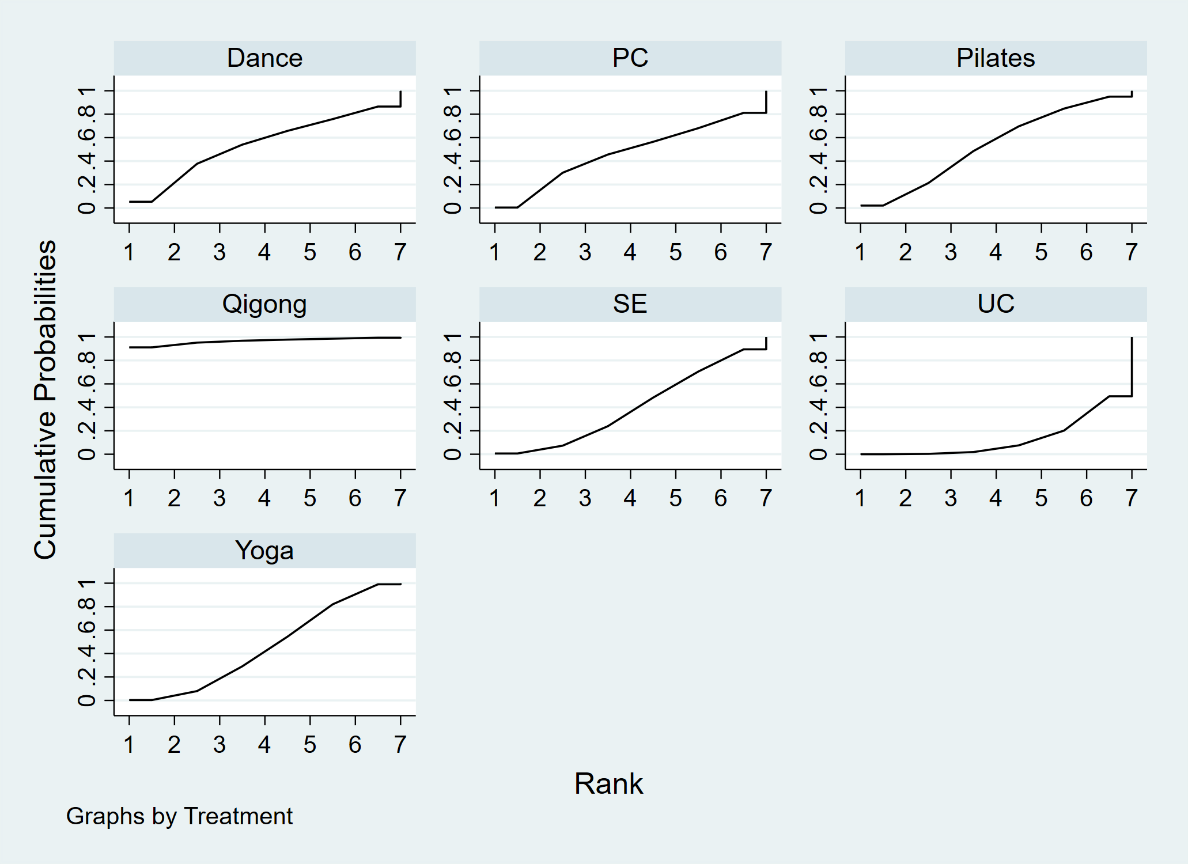


1. Pain intensity (remove 2 literatures)

Table S9: League table on pain intensity

| _Qigong_ | _Taichi_ | _Pilates_ | _Dance_ | _UC_ | _PC_ | _Yoga_ | _SE_ |
| --- | --- | --- | --- | --- | --- | --- | --- |
| Qigong | 1.51  (-0.57,3.59) | 2.25 (0.32,4.18) | 2.41 (0.21,4.60) | 2.48 (0.47,4.48) | 2.47 (0.88,4.07) | 2.57 (0.53,4.61) | 2.70 (0.77,4.63) |
| -1.51  (-3.59,0.57) | Taichi | 0.74  (-0.34,1.83) | 0.90  (-0.56,2.35) | 0.97  (-0.13,2.06) | 0.97  (-0.37,2.30) | 1.06  (-0.05,2.17) | 1.19 (0.41,1.96) |
| **-2.25**  **(-4.18, -0.32)** | -0.74  (-1.83,0.34) | Pilates | 0.16  (-0.95,1.26) | 0.22  (-0.54,0.99) | 0.22  (-0.87,1.31) | 0.32  (-0.57,1.21) | 0.44  (-0.32,1.20) |
| **-2.41**  **(-4.60, -0.21)** | -0.90  (-2.35,0.56) | -0.16  (-1.26,0.95) | Dance | 0.07  (-1.04,1.18) | 0.07  (-1.44,1.57) | 0.16  (-1.07,1.40) | 0.29  (-0.95,1.52) |
| **-2.48**  **(-4.48, -0.47)** | -0.97  (-2.06,0.13) | -0.22  (-0.99,0.54) | -0.07  (-1.18,1.04) | UC | 0.00  (-1.22,1.22) | 0.09  (-0.53,0.71) | 0.22  (-0.55,1.00) |
| **-2.47**  **(-4.07, -0.88)** | -0.97  (-2.30,0.37) | -0.22  (-1.31,0.87) | -0.07  (-1.57,1.44) | 0.00  (-1.22,1.22) | PC | 0.09  (-1.18,1.36) | 0.22  (-0.87,1.31) |
| **-2.57**  **(-4.61, -0.53)** | -1.06  (-2.17,0.05) | -0.32  (-1.21,0.57) | -0.16  (-1.40,1.07) | -0.09  (-0.71,0.53) | -0.09  (-1.36,1.18) | Yoga | 0.13  (-0.67,0.93) |
| **-2.70**  **(-4.63, -0.77)** | **-1.19**  **(-1.96, -0.41)** | -0.44  (-1.20,0.32) | -0.29  (-1.52,0.95) | -0.22  (-1.00,0.55) | -0.22  (-1.31,0.87) | -0.13  (-0.93,0.67) | SE |
| The bold font indicates a statistical difference. PC (Passive Control), SE (Standard Exercise), UC (Usual Care). | | | | | | | |

Figure S3: The rank probability of pain intensity various interventions based on the SUCRA. The SUCRA metric was used to rank the effectiveness of each treatment and identify the best treatment. PC (passive control), SE (Standard Exercise), UC (Usual Care).


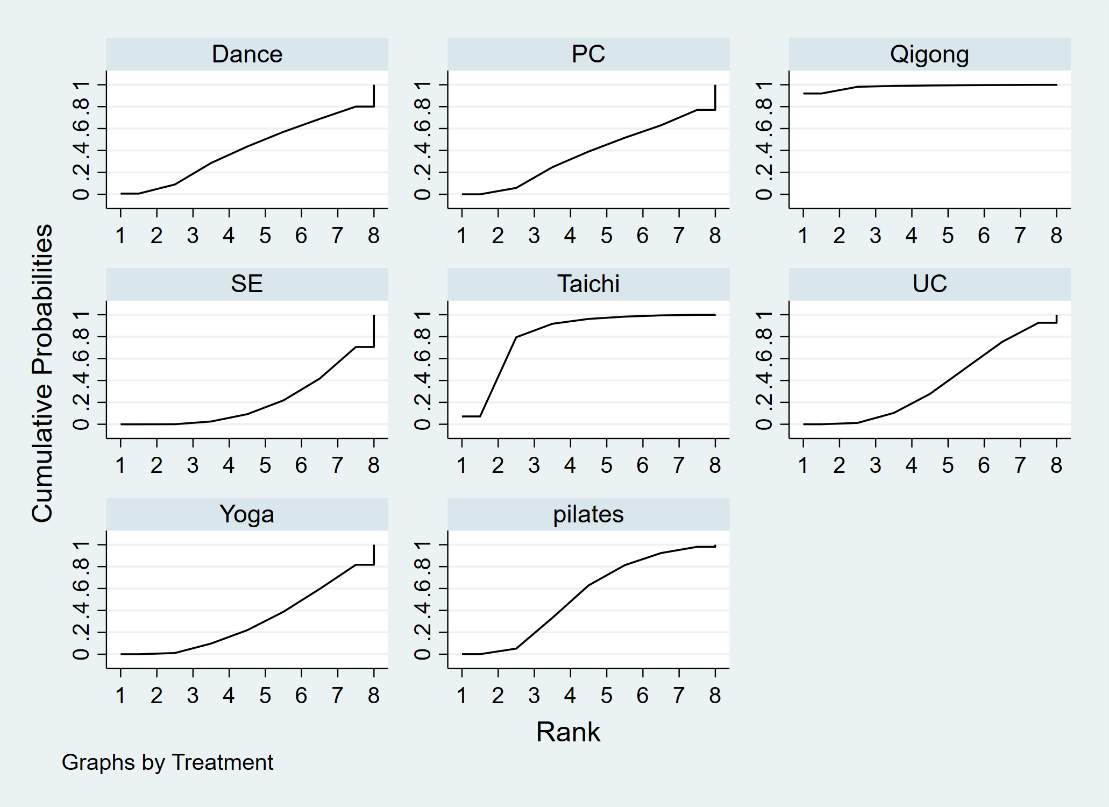


1. Fatigue (remove 2 literatures)

Table S10 League table on Fatigue.

| _Qigong_ | _Dance_ | _Pilates_ | _SE_ | _PC_ | _Yoga_ | _UC_ |
| --- | --- | --- | --- | --- | --- | --- |
| Qigong | 0.87  (-0.57,2.31) | 0.90  (-0.54,2.34) | 0.98  (-0.53,2.48) | 1.04 (0.04,2.04) | 1.07  (-0.11,2.26) | 1.15  (-0.09,2.39) |
| -0.87  (-2.31,0.57) | Dance | 0.03  (-0.69,0.75) | 0.11  (-0.73,0.95) | 0.17  (-0.87,1.21) | 0.20  (-0.61,1.02) | 0.28  (-0.46,1.02) |
| -0.90  (-2.34,0.54) | -0.03  (-0.75,0.69) | Pilates | 0.08  (-0.36,0.51) | 0.14  (-0.90,1.18) | 0.17  (-0.65,0.99) | 0.25  (-0.49,0.99) |
| -0.98  (-2.48,0.53) | -0.11  (-0.95,0.73) | -0.08  (-0.51,0.36) | SE | 0.06  (-1.07,1.19) | 0.10  (-0.83,1.02) | 0.17  (-0.69,1.03) |
| **-1.04**  **(-2.04, -0.04)** | -0.17  (-1.21,0.87) | -0.14  (-1.18,0.90) | -0.06  (-1.19,1.07) | PC | 0.04  (-0.61,0.68) | 0.11  (-0.62,0.84) |
| -1.07  (-2.26, 0.11) | -0.20  (-1.02,0.61) | -0.17  (-0.99,0.65) | -0.10  (-1.02,0.83) | -0.04  (-0.68,0.61) | Yoga | 0.07  (-0.28,0.43) |
| -1.15  (-2.39, 0.09) | -0.28  (-1.02,0.46) | -0.25  (-0.99,0.49) | -0.17  (-1.03,0.69) | -0.11  (-0.84,0.62) | -0.07  (-0.43,0.28) | UC |
| The bold font indicates a statistical difference. PC (Passive Control), SE (Standard Exercise), UC (Usual Care). | | | | | | |

Figure S4: The rank probability of pain intensity various interventions based on the SUCRA. The SUCRA metric was used to rank the effectiveness of each treatment and identify the best treatment. PC (passive control), SE (Standard Exercise), UC (Usual Care).


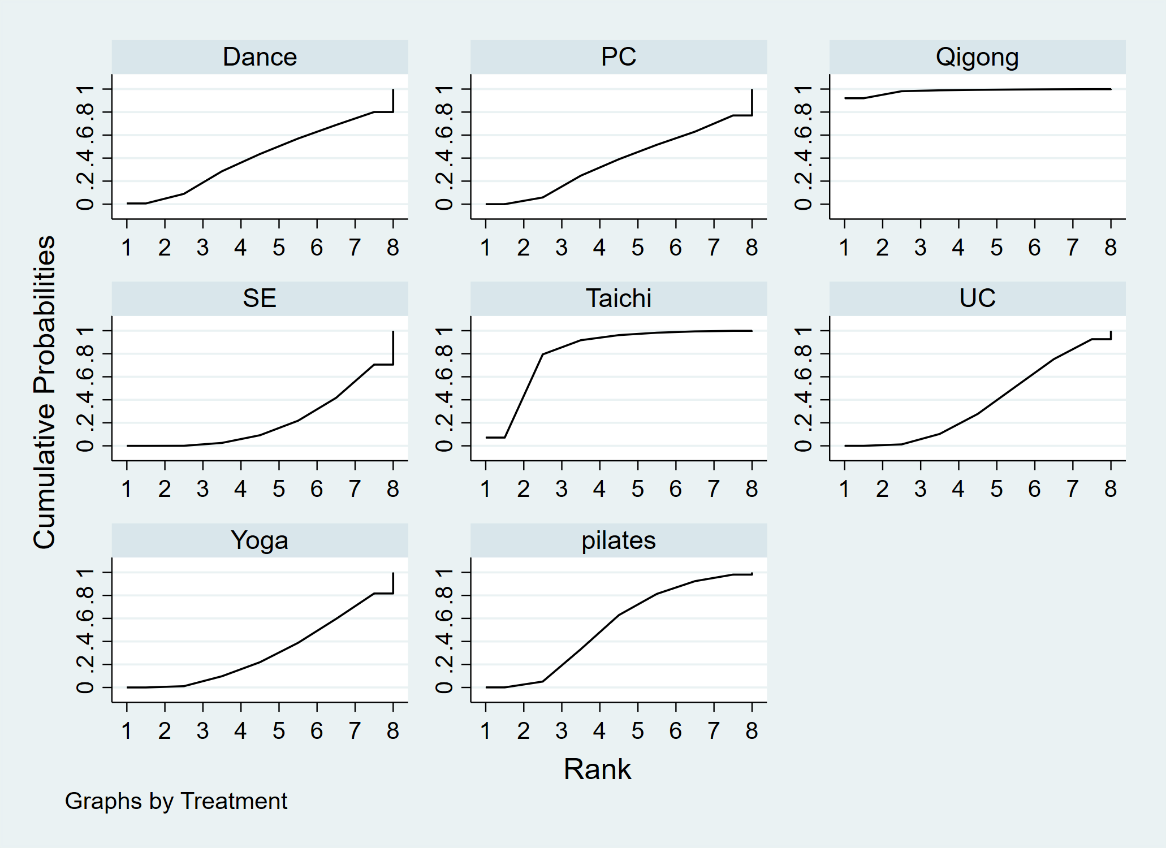


1. Pain intensity (remove Constant-Murley Score pain component)

Table S11. League table on pain intensity

| _Taichi_ | _Yoga_ | _Pilates_ | _PC_ | _Dance_ | _SE_ | _UC_ |
| --- | --- | --- | --- | --- | --- | --- |
| Taichi | 1.86 (0.50,3.22) | 1.88 (0.51,3.25) | 2.04 (0.54,3.55) | 2.09 (0.36,3.82) | 2.10 (0.91,3.30) | 2.21 (0.83,3.60) |
| **-1.86 (-3.22, -0.50)** | Yoga | 0.02 (-0.66,0.69) | 0.18 (-0.69,1.06) | 0.23 (-0.98,1.44) | 0.24 (-0.40,0.89) | 0.35 (-0.14,0.85) |
| **-1.88 (-3.25, -0.51)** | -0.02 (-0.69,0.66) | Pilates | 0.16 (-0.76,1.08) | 0.21 (-0.94,1.37) | 0.23 (-0.44,0.89) | 0.34 (-0.35,1.02) |
| **-2.04 (-3.55, -0.54)** | -0.18 (-1.06,0.69) | -0.16 (-1.08,0.76) | PC | 0.05 (-1.36,1.45) | 0.06 (-0.85,0.97) | 0.17 (-0.78,1.12) |
| **-2.09 (-3.82, -0.36)** | -0.23 (-1.44,0.98) | -0.21 (-1.37,0.94) | -0.05 (-1.45,1.36) | Dance | 0.02 (-1.24,1.27) | 0.12 (-1.03,1.28) |
| **-2.10 (-3.30, -0.91)** | -0.24 (-0.89,0.40) | -0.23 (-0.89,0.44) | -0.06 (-0.97,0.85) | -0.02 (-1.27,1.24) | SE | 0.11 (-0.59,0.81) |
| **-2.21 (-3.60, -0.83)** | -0.35 (-0.85,0.14) | -0.34 (-1.02,0.35) | -0.17 (-1.12,0.78) | -0.12 (-1.28,1.03) | -0.11 (-0.81,0.59) | UC |
| The bold font indicates a statistical difference. PC (Passive Control), SE (Standard Exercise), UC (Usual Care). | | | | | | |

Figure S5. SUCRA ranking for pain intensity after excluding studies using the Constant-Murley Score pain component. SUCRA was used to explore the ranking probabilities of the remaining interventions after excluding studies using the Constant-Murley pain component. PC (passive control), SE (Standard Exercise), UC (Usual Care).

**
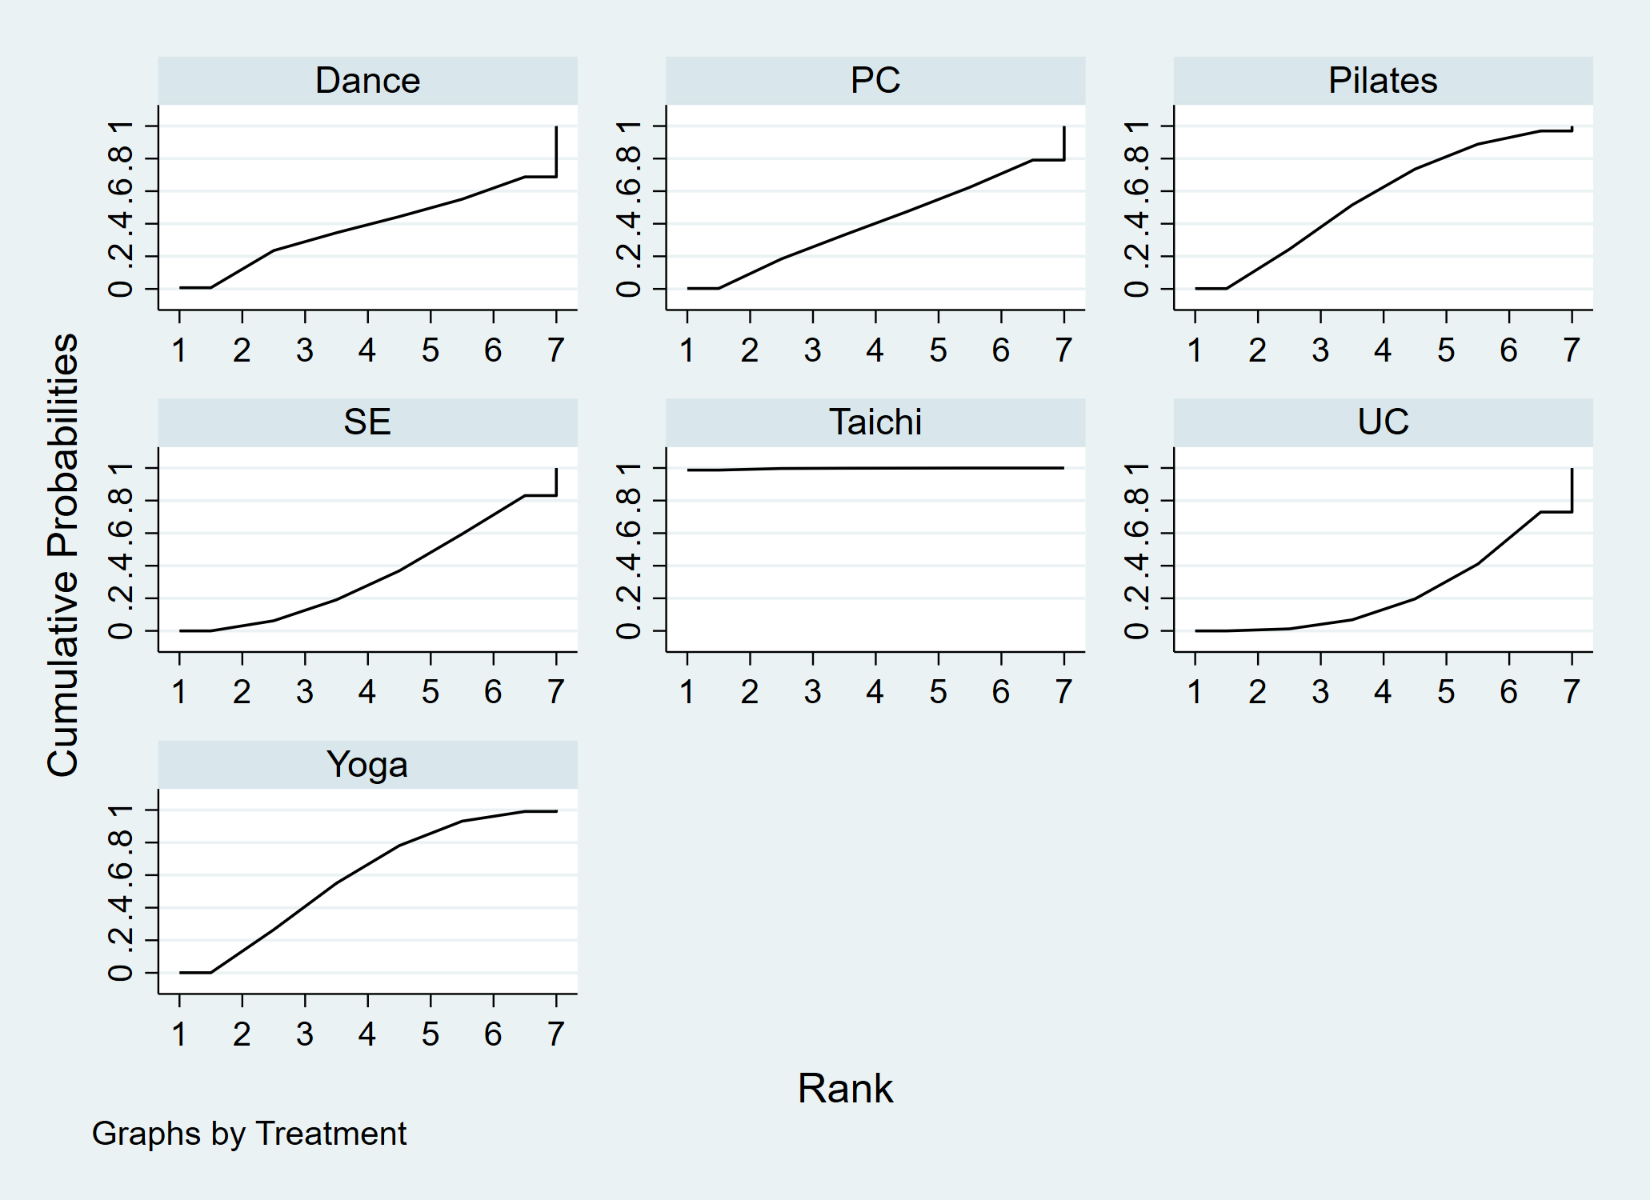
**

1. Pain intensity (remove laughter-yoga)

Table S12. League table on pain intensity

| _Qigong_ | _Taichi_ | _Yoga_ | _Pilates_ | _Dance_ | _PC_ | _SE_ | _UC_ |
| --- | --- | --- | --- | --- | --- | --- | --- |
| Qigong | 1.33 (-0.95,3.62) | 2.30 (0.25,4.36) | 2.29 (0.21,4.37) | 2.49 (0.08,4.89) | 2.47 (0.68,4.27) | 2.53 (0.46,4.61) | 2.59 (0.50,4.69) |
| -1.33 (-3.62,0.95) | Taichi | 0.97 (-0.24,2.19) | 0.96 (-0.27,2.19) | 1.15 (-0.57,2.88) | 1.14 (-0.28,2.56) | 1.20 (0.24,2.17) | 1.26 (0.00,2.52) |
| **-2.30 (-4.36, -0.25)** | -0.97 (-2.19,0.24) | Yoga | -0.01 (-0.79,0.77) | 0.18 (-1.20,1.56) | 0.17 (-0.84,1.17) | 0.23 (-0.51,0.97) | 0.29 (-0.28,0.86) |
| **-2.29 (-4.37, -0.21)** | -0.96 (-2.19,0.27) | 0.01 (-0.77,0.79) | Pilates | 0.19 (-1.12,1.51) | 0.18 (-0.87,1.23) | 0.24 (-0.52,1.00) | 0.30 (-0.48,1.08) |
| **-2.49 (-4.89, -0.08)** | -1.15 (-2.88,0.57) | -0.18 (-1.56,1.20) | -0.19 (-1.51,1.12) | Dance | -0.01 (-1.62,1.59) | 0.05 (-1.38,1.48) | 0.11 (-1.21,1.43) |
| **-2.47 (-4.27, -0.68)** | -1.14 (-2.56,0.28) | -0.17 (-1.17,0.84) | -0.18 (-1.23,0.87) | 0.01 (-1.59,1.62) | PC | 0.06 (-0.98,1.10) | 0.12 (-0.97,1.21) |
| **-2.53 (-4.61, -0.46)** | **-1.20 (-2.17, -0.24)** | -0.23 (-0.97,0.51) | -0.24 (-1.00,0.52) | -0.05 (-1.48,1.38) | -0.06 (-1.10,0.98) | SE | 0.06 (-0.75,0.87) |
| **-2.59 (-4.69, -0.50)** | -1.26 (-2.52, 0.00) | -0.29 (-0.86,0.28) | -0.30 (-1.08,0.48) | -0.11 (-1.43,1.21) | -0.12 (-1.21,0.97) | -0.06 (-0.87,0.75) | UC |
| The bold font indicates a statistical difference. PC (Passive Control), SE (Standard Exercise), UC (Usual Care). | | | | | | | |

Figure S6.SUCRA ranking for pain intensity after excluding the laughter yoga study. SUCRA was used to explore the ranking probabilities of the remaining interventions after excluding the study using laughter yoga. PC (passive control), SE (Standard Exercise), UC (Usual Care).

**
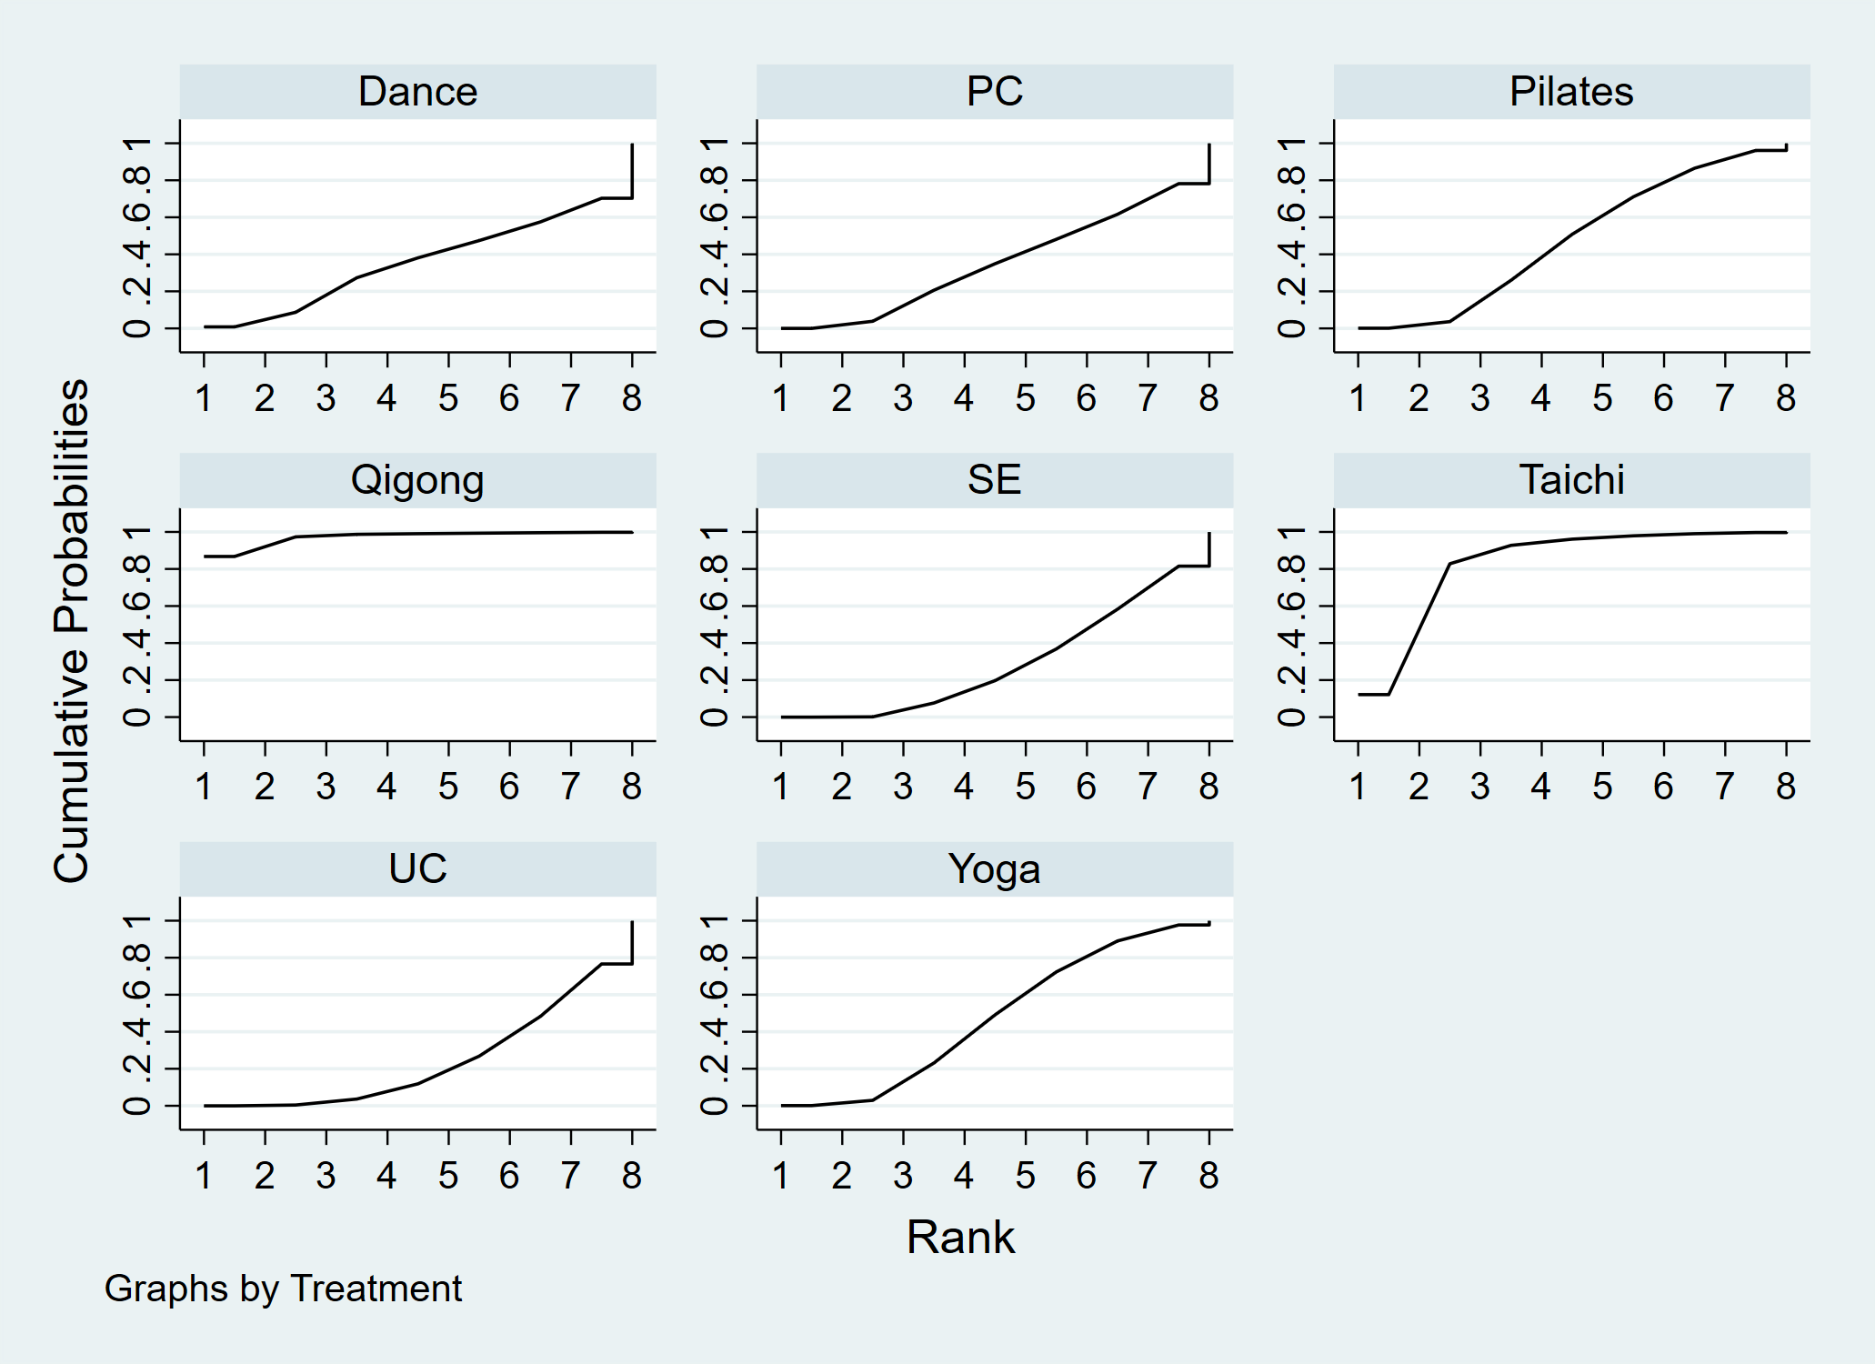
**

1. Fatigue (remove laughter-yoga)

Table S13. League table on fatigue

| _Qigong_ | _Dance_ | _Pilates_ | _PC_ | _Yoga_ | _SE_ | _UC_ |
| --- | --- | --- | --- | --- | --- | --- |
| Qigong | 1.00 (-0.57,2.57) | 1.03 (-0.44,2.50) | 1.04 (-0.04,2.12) | 1.07 (-0.25,2.40) | 1.10 (-0.34,2.54) | 1.29 (-0.09,2.67) |
| -1.00 (-2.57,0.57) | Dance | 0.03 (-0.76,0.81) | 0.04 (-1.10,1.17) | 0.07 (-0.77,0.91) | 0.09 (-0.77,0.96) | 0.29 (-0.51,1.08) |
| -1.03 (-2.50,0.44) | -0.03 (-0.81,0.76) | Pilates | 0.01 (-0.99,1.01) | 0.05 (-0.60,0.69) | 0.07 (-0.46,0.60) | 0.26 (-0.38,0.90) |
| -1.04 (-2.12,0.04) | -0.04 (-1.17,1.10) | -0.01 (-1.01,0.99) | PC | 0.04 (-0.73,0.80) | 0.06 (-0.89,1.01) | 0.25 (-0.61,1.11) |
| -1.07 (-2.40,0.25) | -0.07 (-0.91,0.77) | -0.05 (-0.69,0.60) | -0.04 (-0.80,0.73) | Yoga | 0.02 (-0.54,0.59) | 0.21 (-0.18,0.61) |
| -1.10 (-2.54,0.34) | -0.09 (-0.96,0.77) | -0.07 (-0.60,0.46) | -0.06 (-1.01,0.89) | -0.02 (-0.59,0.54) | SE | 0.19 (-0.43,0.81) |
| -1.29 (-2.67,0.09) | -0.29 (-1.08,0.51) | -0.26 (-0.90,0.38) | -0.25 (-1.11,0.61) | -0.21 (-0.61,0.18) | -0.19 (-0.81,0.43) | UC |

Figure S7. SUCRA ranking for fatigue after excluding the laughter yoga study. SUCRA was used to explore the ranking probabilities of the remaining interventions after excluding the study using laughter yoga. PC (passive control), SE (Standard Exercise), UC (Usual Care).

**
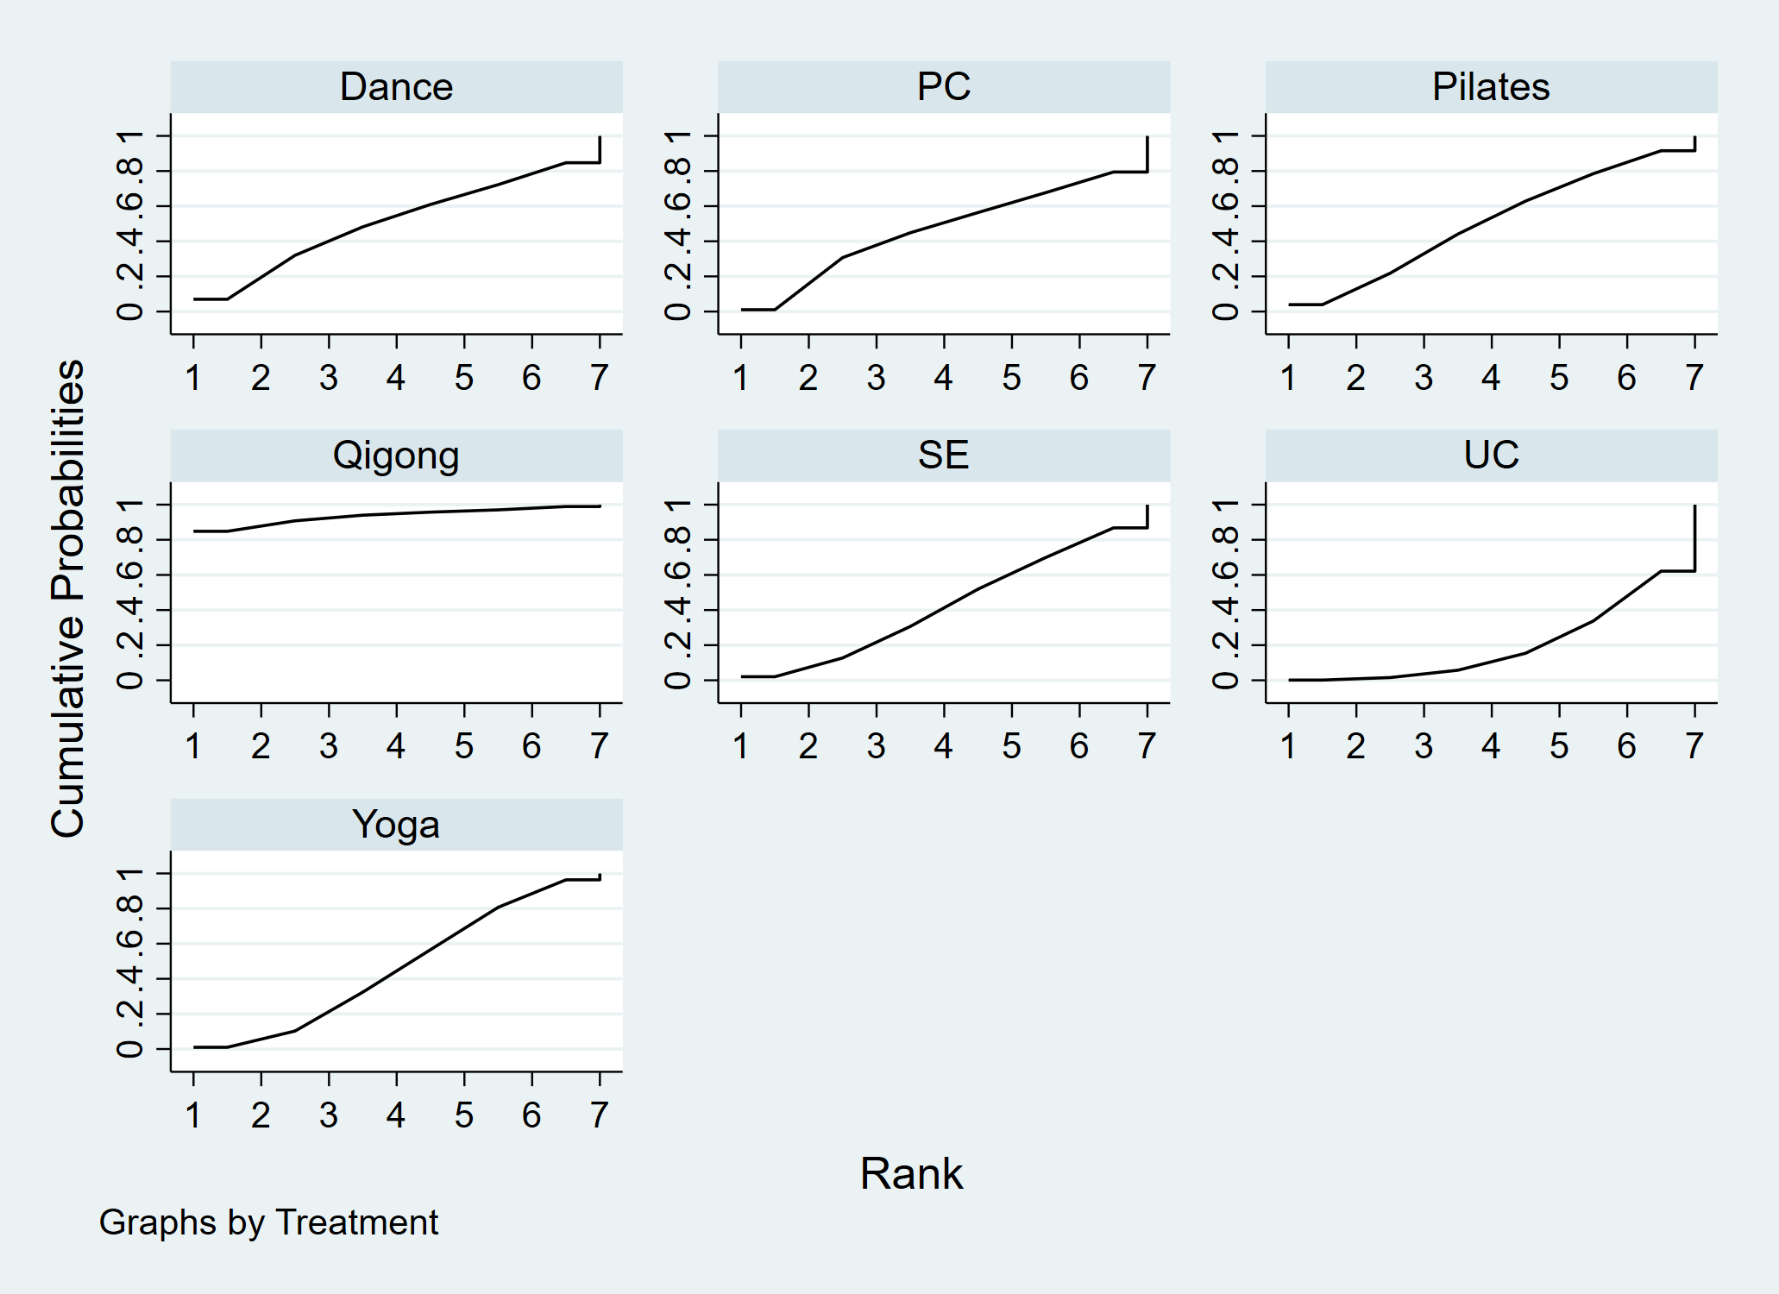
**
